# Supplementary material for: Defective autophagy in neurons and astrocytes from mice deficient in PI(3,5)P2
Source: PubMed Central journal article supplement — Hum Mol Genet. 2009 Sep 29;18(24):4868–78. doi: 10.1093/hmg/ddp460 (PMC2778378; doi:10.1093/hmg/ddp460), 2009-09-29

## SUPPLEMENTAL FIGURE LEGENDS

### **Supplemental Figure 1: TDP-43 is not a component of cytoplasmic inclusions in**

***Fig4*<sup>-/-</sup> brain.** (a) The amount of TDP-43 protein detected by Western blotting is not increased in *Fig4*<sup>-/-</sup> brain. Each lane contains 30 ug protein. (b) TDP-43 in mutant brain is located in DAPI-stained nuclei. (c) TDP-43 does not co-localize with cytoplasmic p62 in mutant brain.

### **Supplemental Figure 2: Accumulation of p62 in Bergmann glia of the *Fig4*<sup>-/-</sup> cerebellum.**

As shown in Figure 4b, Bergmann glia in mutant cerebellum stain intensely with anti-p62 and anti-GFAP. The intense GFAP staining of the processes of the mutant Bergmann glia resembles wildtype cells at an early stage of development.

### **Supplemental Figure 3. As early as one week of age, p62 can be detected at restricted sites in *Fig4*<sup>-/-</sup> brain.** See Legend to Figure 5.

**Supplemental Figure 4: p62 does not accumulate in oligodendrocytes and microglia of *Fig4*<sup>-/-</sup> brain.** (a) Oligodendrocytes identified by *in situ* hybridization of MAG mRNA encoding myelin-associated glycoprotein do not contain p62. (b) Microglia identified by staining with anti-Iba-1 (green) do not co-stain for p62 (red). (c) Western blot of total brain homogenate (30 ug protein per lane) stained with anti-Iba-1. (

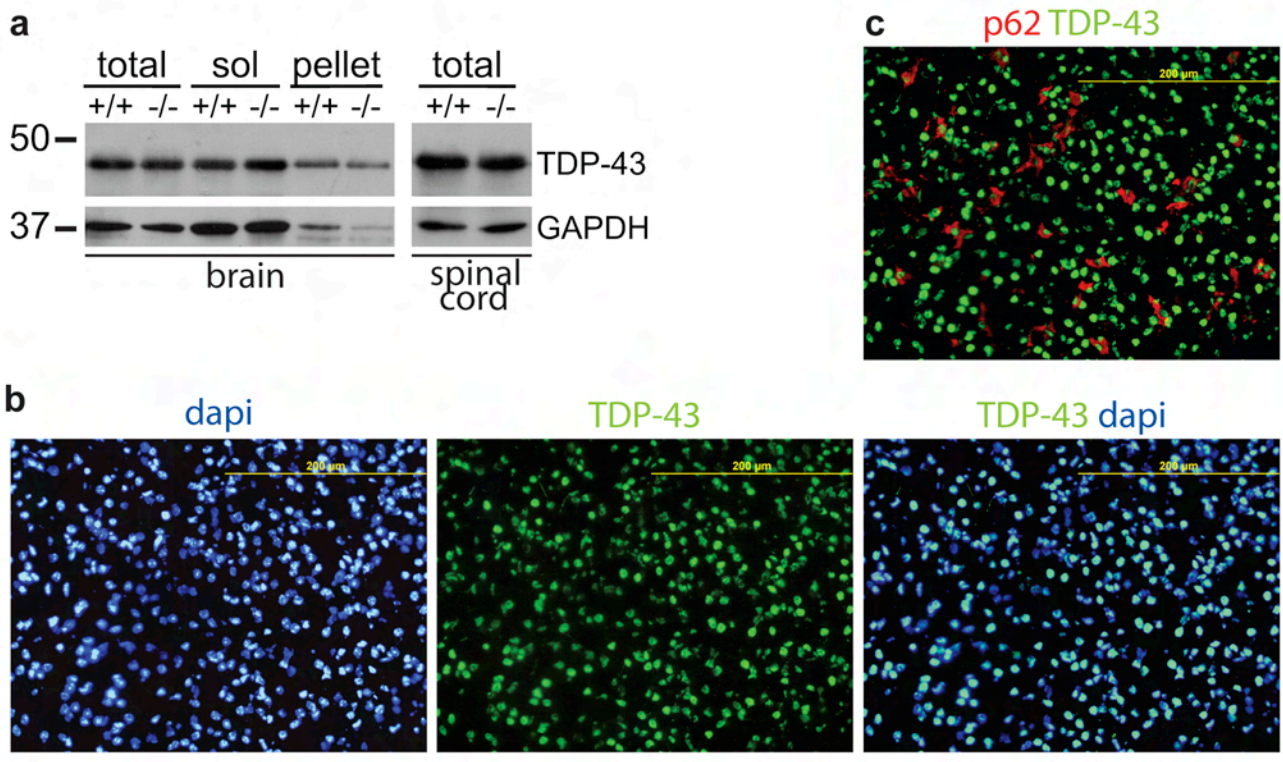

Supplemental figure-1 (Meisler)

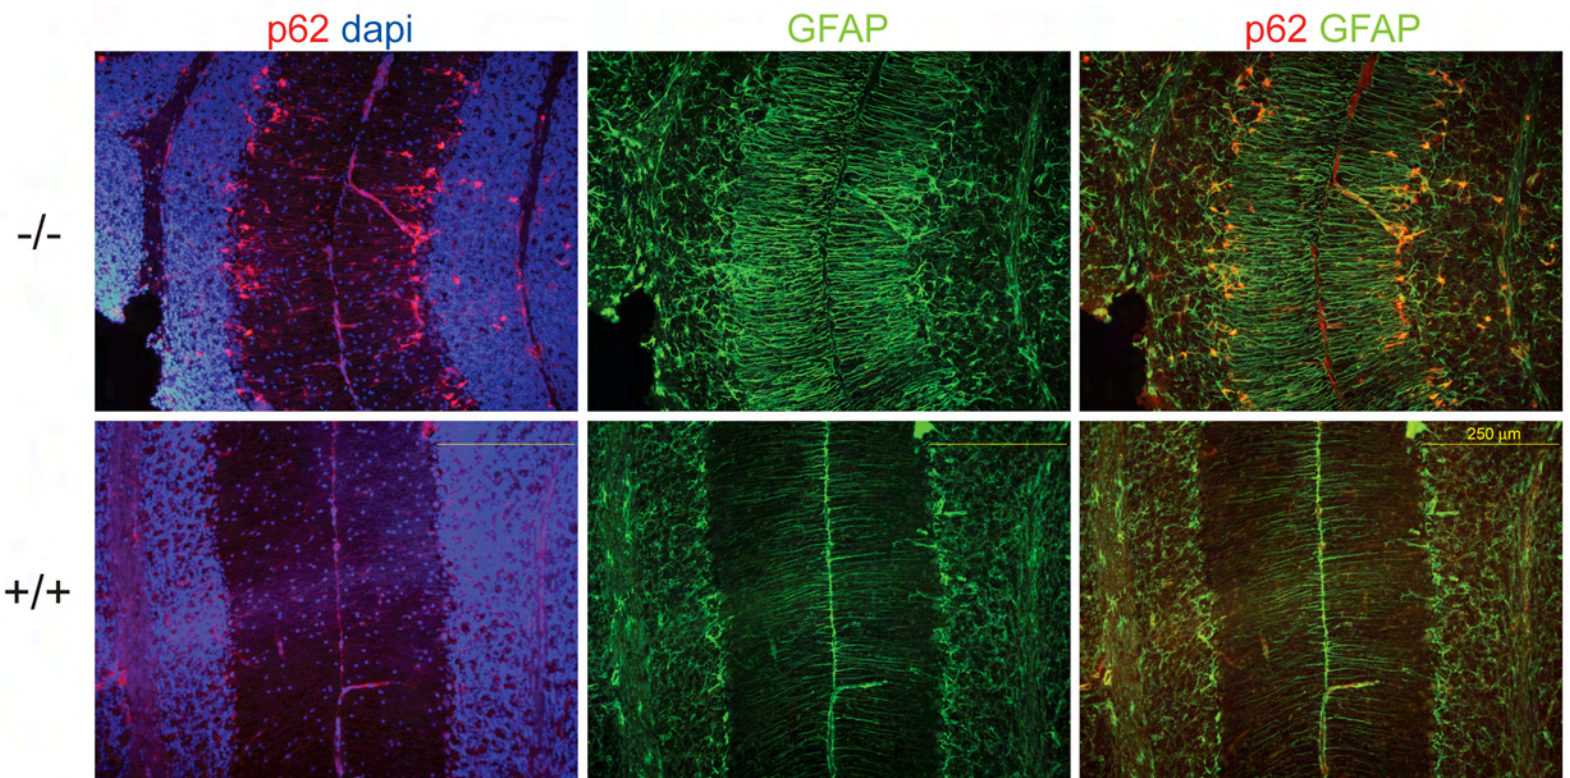

Supplemental figure-2 (Meisler)

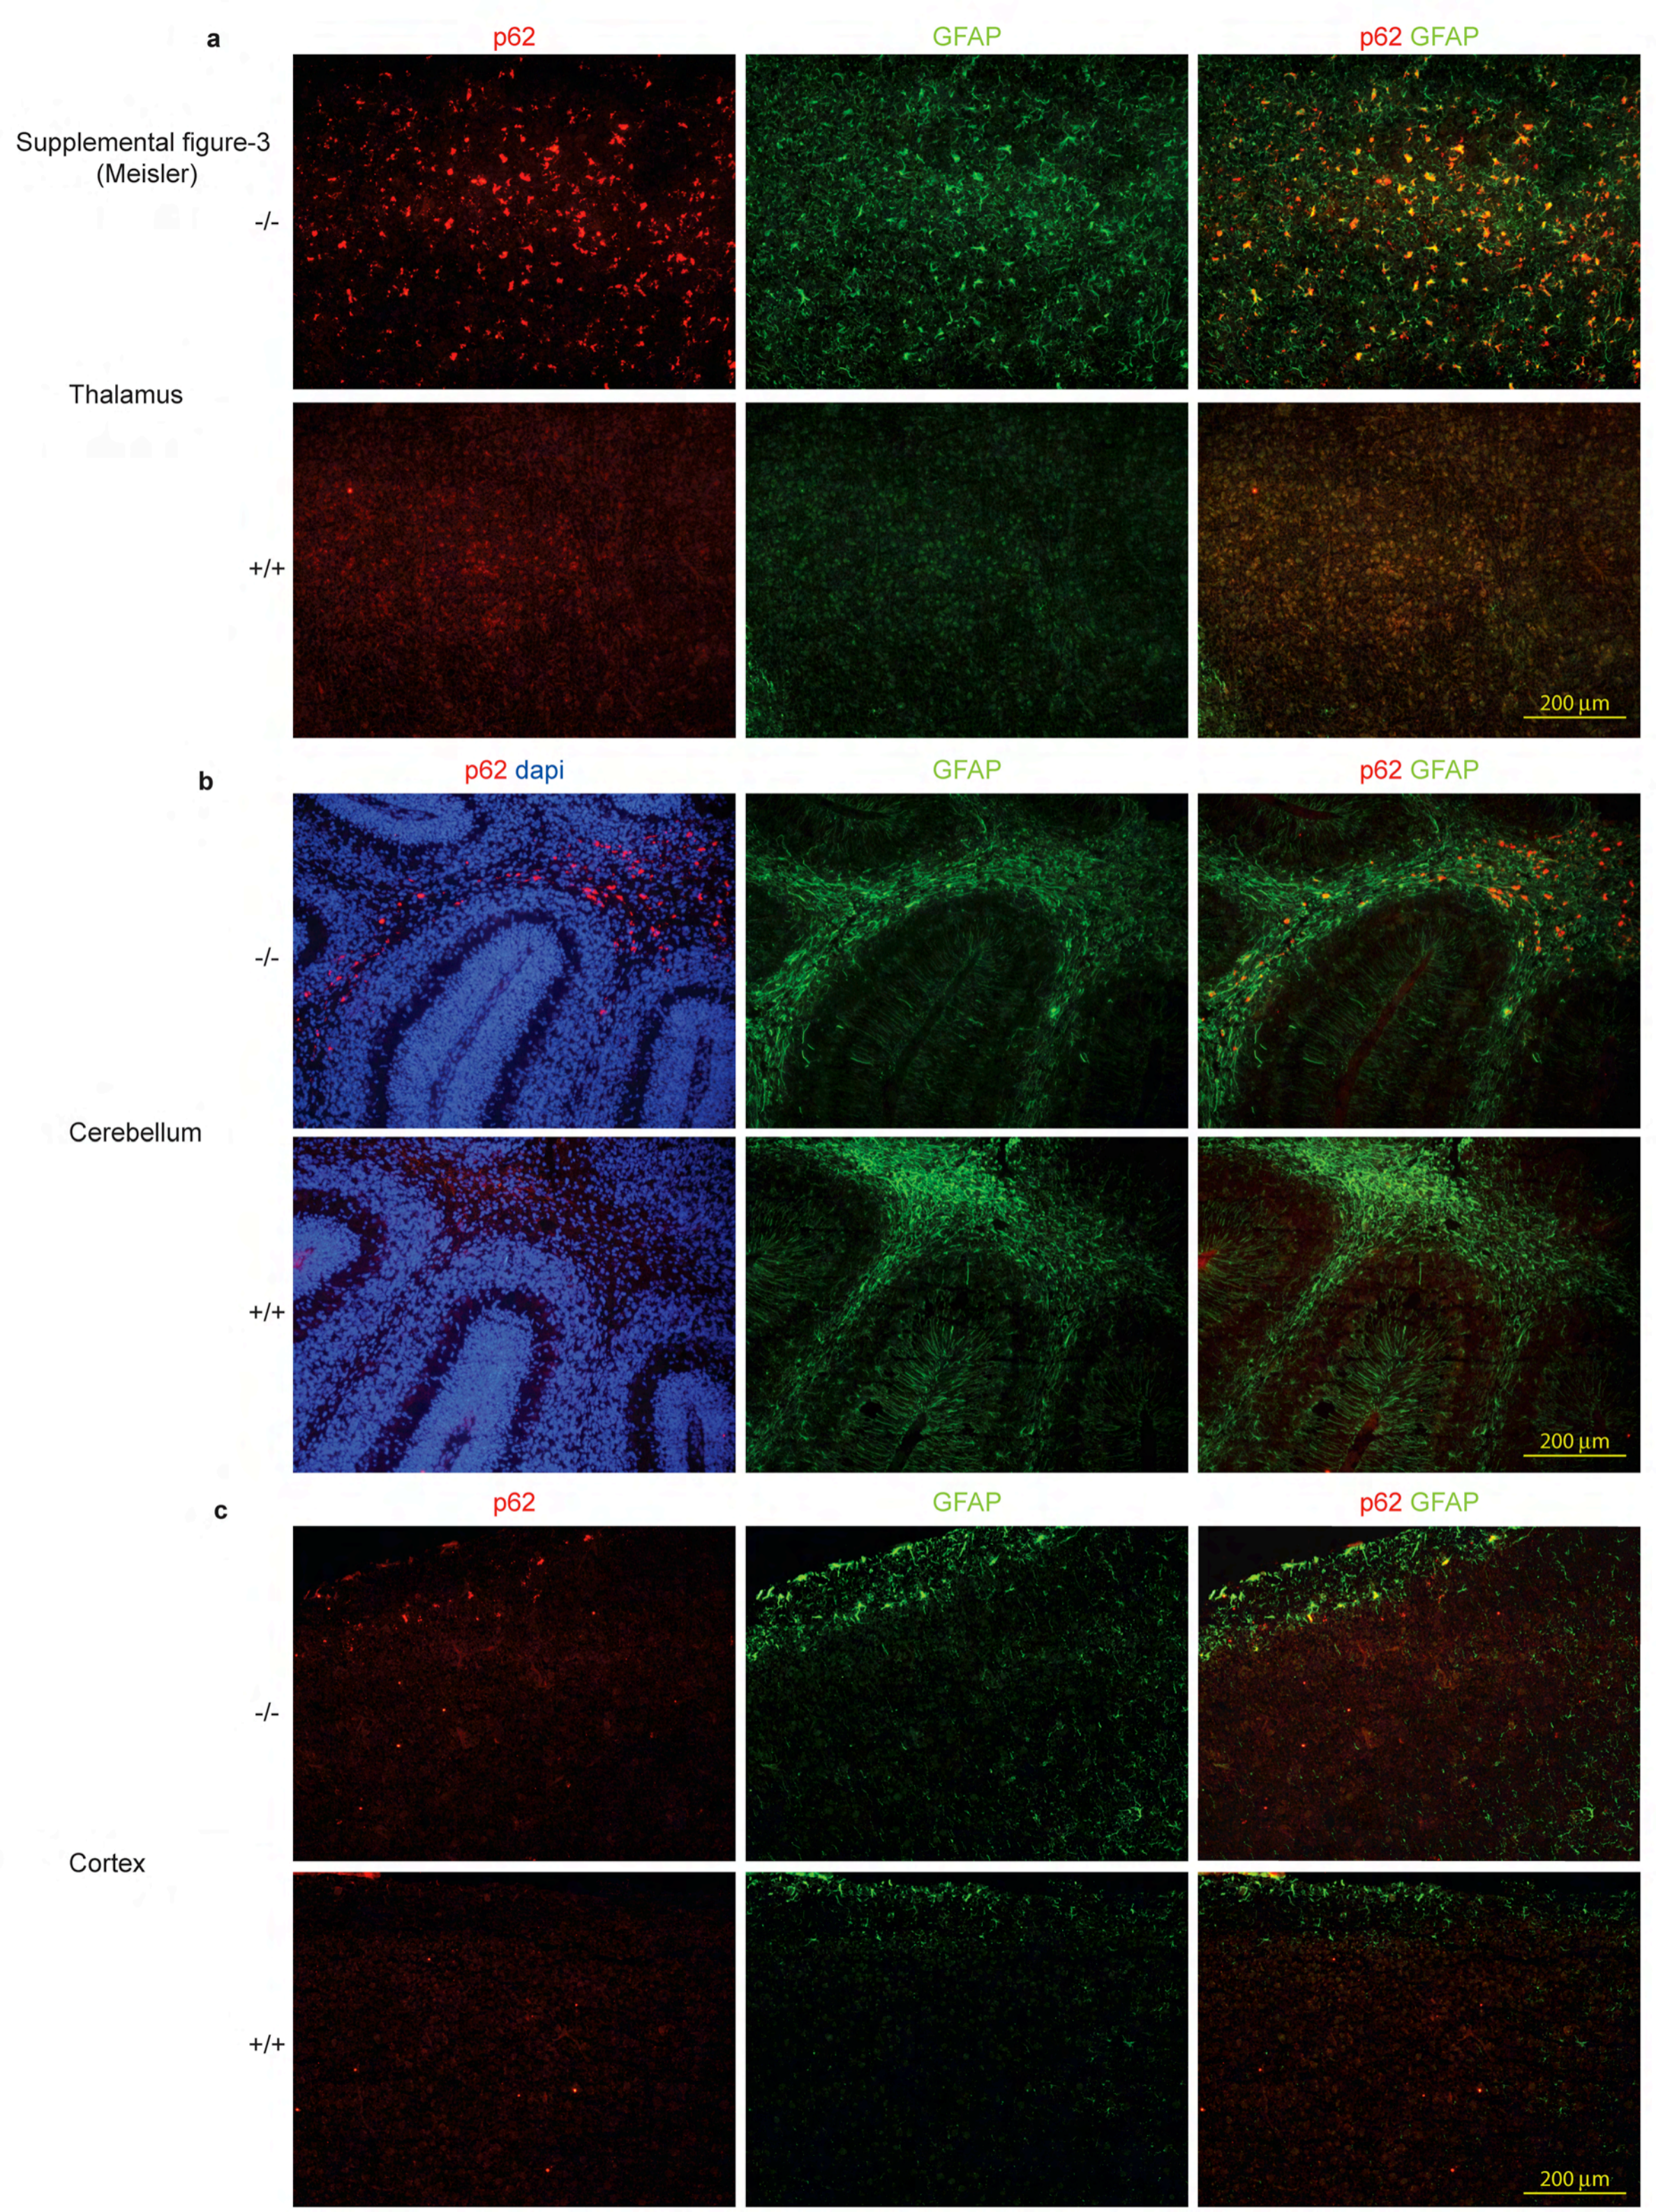

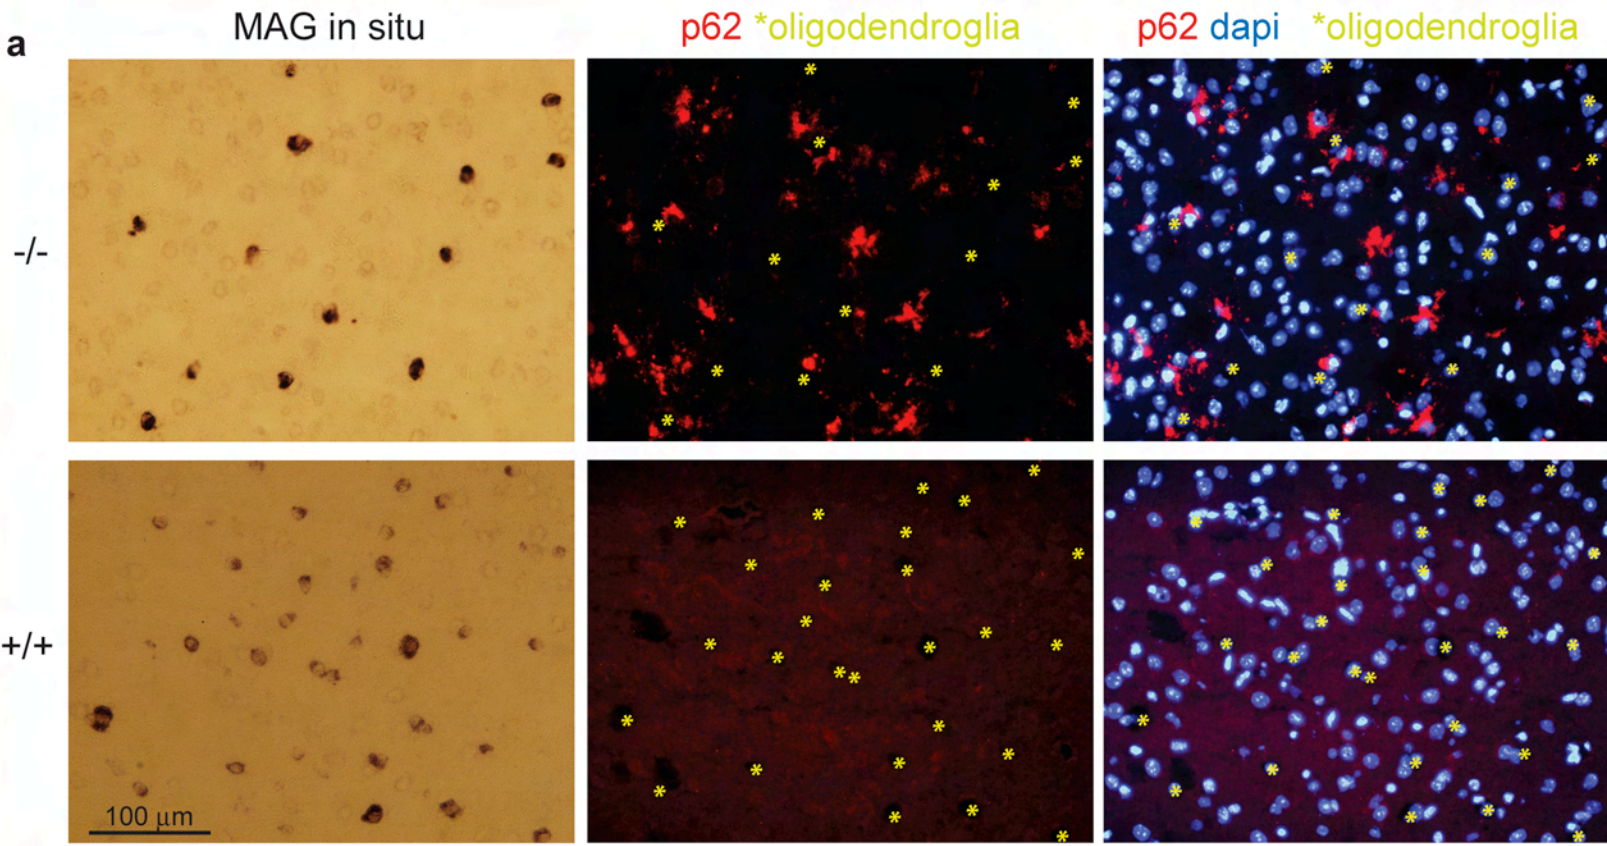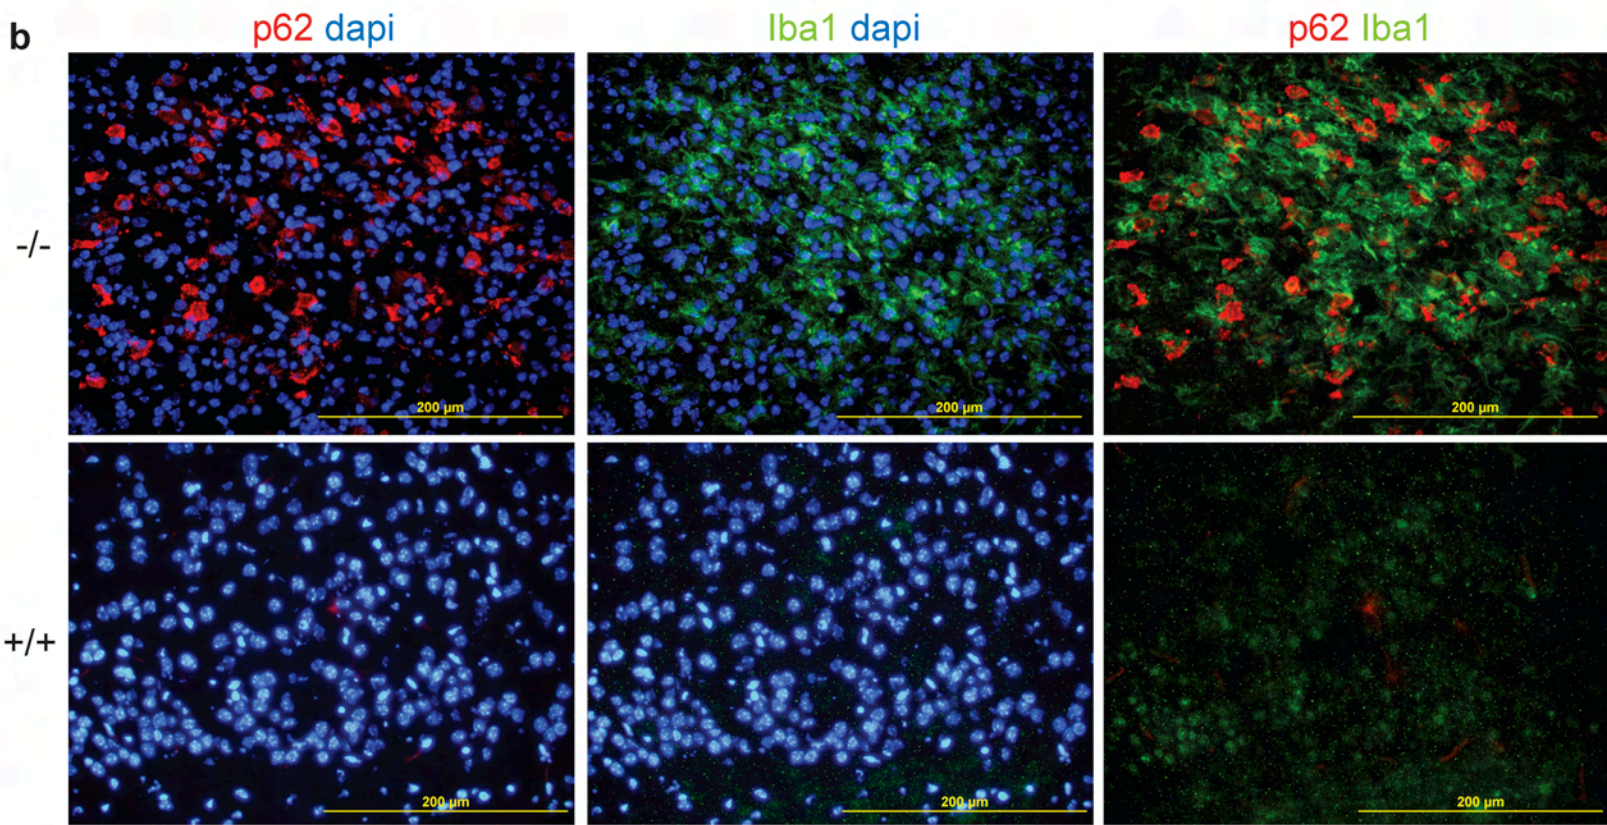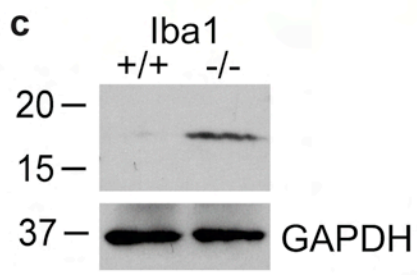

Supplement: ddp460_1.pdf [file ddp460_1.pdf]
